# Supplementary material for: Dissecting Leishmania infantum Energy Metabolism - A Systems Perspective
Source: PLoS One. 2015 Sep 14;10(9):e0137976. doi: 10.1371/journal.pone.0137976 (PMC4569355; doi:10.1371/journal.pone.0137976)
Supplement: S2 Table — This excel file contains the set of enzymes whose subcellular localizations were confirmed by detection of cellular signals in their homologous protein sequences obtained as a result of performing BLAST against the RefSeq database excluding sequences from Genus Leishmania. (XLS) [file pone.0137976.s007.xls]

## Sheet: Confirming with homologoues
Confirmation by sequence based prediction of cellular signals in homologues obtained from organisms other than Genus Leishmania
Query Gene/Protein	Gene ID	Closest neighbours in clade (as obtained from BLAST hits)	Organism name	Protein ID	PTS1	PTS2	Target P
D-lactate dehydrogenase-like protein	LINJ_27_1940	d-lactate dehydrogenase-like protein (ISS), partial	Ostreococcus tauri	XP_003080909.2	√	---	---
		acetyltransferase-like/FAD linked oxidase	Micromonas sp. RCC299	XP_002500277	√	---	---
		acetyltransferase-like/FAD linked oxidase	Micromonas pusilla CCMP1545	XP_002500277.1	√	---	---
		predicted protein	Ostreococcus lucimarinus CCE9901	XP_003061917.1	__	---	---
D-lactate dehydrogenase-like protein	LINJ_29_0290	d-lactate dehydrogenase-like protein (ISS), partial	Ostreococcus tauri	XP_003080909.2	√	---	---
		acetyltransferase-like/FAD linked oxidase	Micromonas sp. RCC299	XP_002500277	√	---	---
		acetyltransferase-like/FAD linked oxidase	Micromonas pusilla CCMP1545	XP_002500277.1	√	---	---
		predicted protein	Ostreococcus lucimarinus CCE9901	XP_003061917.1	---	---	---
Fructose-1,6-bisphosphate aldolase	LINJ_36_1320	fructose-bisphosphate aldolase	Trypanosoma cruzi strain CL Brener	XP_809370.1	---	√	---
		fructose-bisphosphate aldolase	Trypanosoma cruzi strain CL Brener	XP_809369.1	---	√	---
		fructose-bisphosphate aldolase	Trypanosoma cruzi strain CL Brener	XP_807948.1	---	√	---
		fructose-bisphosphate aldolase	Trypanosoma cruzi strain CL Brener	XP_807947.1	---	---	---
2-oxoglutarate dehydrogenase subunit	LINJ_36_3630	2-oxoglutarate dehydrogenase E1 subunit	Trypanosoma cruzi strain CL Brener	XP_805402.1	---	---	Mitochondria
		2-oxoglutarate dehydrogenase E1 subunit	Trypanosoma cruzi strain CL Brener	XP_815027.1	---	---	Mitochondria
		2-oxoglutarate dehydrogenase E1 subunit	Trypanosoma brucei brucei strain 927/4 GUTat10.1	XP_829062.1	---	---	Mitochondria
2-oxoglutarate dehydrogenase E1 subunit	LINJ_27_0740	2-oxoglutarate dehydrogenase subunit	Trypanosoma brucei brucei strain 927/4 GUTat10.1	XP_828236.1	---	---	Mitochondria
		2-oxoglutarate dehydrogenase subunit	Trypanosoma cruzi strain CL Brener	XP_807183.1	---	---	Mitochondria
2-oxoglutarate dehydrogenase E2 subunit	LINJ_28_2600	2-oxoglutarate dehydrogenase E2 subunit	Trypanosoma brucei brucei strain 927/4 GUTat10.1	XP_829231.1	---	---	Mitochondria
		2-oxoglutarate dehydrogenase E2 subunit	Trypanosoma cruzi strain CL Brener	XP_803343.1	---	---	Mitochondria
		2-oxoglutarate dehydrogenase E2 subunit	Trypanosoma cruzi strain CL Brener	XP_808326.1	---	---	Mitochondria
Ribulokinase	LINJ_36_0060	L-ribulokinase	Trypanosoma cruzi strain CL Brener	XP_811825.1	√	---	---
Galactokinase	LINJ_35_2790	galactokinase	Trypanosoma cruzi strain CL Brener	XP_812977.1	---	√	---
		galactokinase	Trypanosoma cruzi strain CL Brener	XP_813953.1	---	√	---
		galactokinase	Trypanosoma cruzi strain CL Brener	XP_813139.1	√	---	---
		galactokinase	Trypanosoma cruzi strain CL Brener	XP_811906.1	√	---	---
Malic enzyme	LINJ_24_0790	malic enzyme	Trypanosoma cruzi strain CL Brener	XP_814409.1	---	---	Mitochondria
		malic enzyme	Trypanosoma cruzi strain CL Brener	XP_818258.1	---	---	Mitochondria
		malic enzyme	Trypanosoma brucei brucei strain 927/4 GUTat10.1	XP_828620.1	---	---	Mitochondria
alanine aminotransferase	LINJ_12_0580	alanine aminotransferase	Trypanosoma cruzi strain CL Brener	XP_820876.1	---	---	Mitochondria
		alanine aminotransferase	Trypanosoma cruzi strain CL Brener	XP_820878.1	---	---	Mitochondria
		alanine aminotransferase	Trypanosoma cruzi strain CL Brener	XP_821936.1	---	---	Mitochondria
		alanine aminotransferase	Trypanosoma cruzi strain CL Brener	XP_821938.1	---	---	Mitochondria
		alanine aminotransferase	Trypanosoma brucei brucei strain 927/4 GUTat10.1	XP_001219089.1	---	---	__
aspartate aminotransferase	LINJ_24_0370	aspartate aminotransferase, mitochondrial	Trypanosoma cruzi strain CL Brener	XP_808313.1	---	---	Mitochondria
		aspartate aminotransferase, mitochondrial	Trypanosoma brucei brucei strain 927/4 GUTat10.1	XP_828584.1	---	---	Mitochondria
